# Supplementary material for: Lithographically-featured photonic microparticles of colloidal assemblies
Source: Royal Society of Chemistry journal article supplement (doi:10.1039/c0cp00134a), 2010-01-01
Supplement: c0cp00134a.pdf [file c0cp00134a.pdf]

## Electronic Supplementary Information

# Lithographically-Featured Photonic Microparticles of Colloidal Assemblies

*Su Yeon Lee, Shin-Hyun Kim, Chul-Joon Heo, Hyerim Hwang, and Seung-Man Yang\**

National Creative Research Initiative Center for Integrated Optofluidic Systems and  
Department of Chemical and Biomolecular Engineering, Korea Advanced Institute of Science  
and Technology, Daejeon, 305-701 Korea

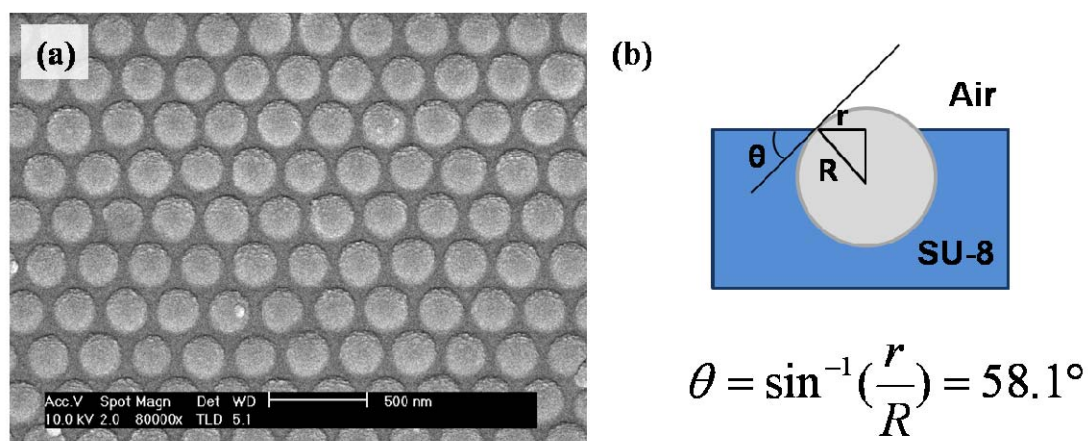

Figure S1. (a) SEM image of the top hexagonal array of colloidal crystal trapped at the interface between air and SU-8. (b) The schematic diagram for contact angle measurement.

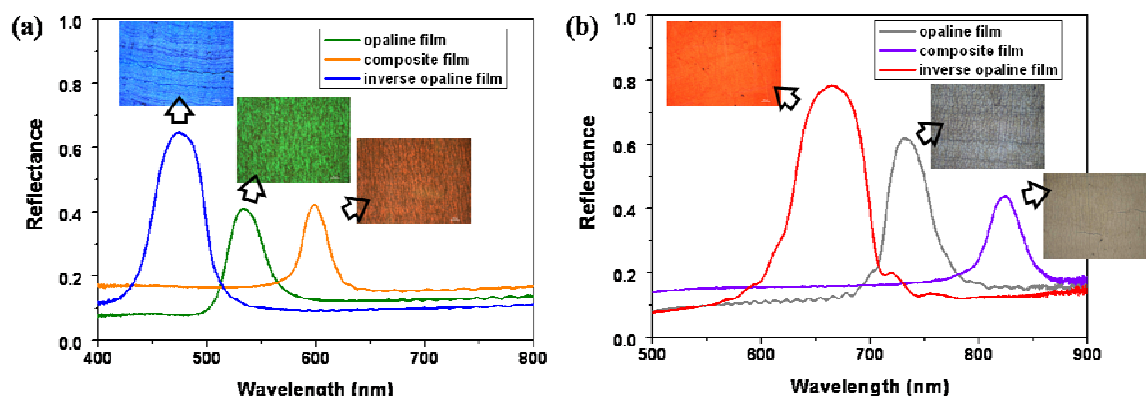

Figure S2. (a, b) The reflectance spectra and the corresponding optical microscope images of opal, composite, and inverse-opal structures prepared with monodisperse silica particles of 245 nm and 340 nm in diameter, respectively.

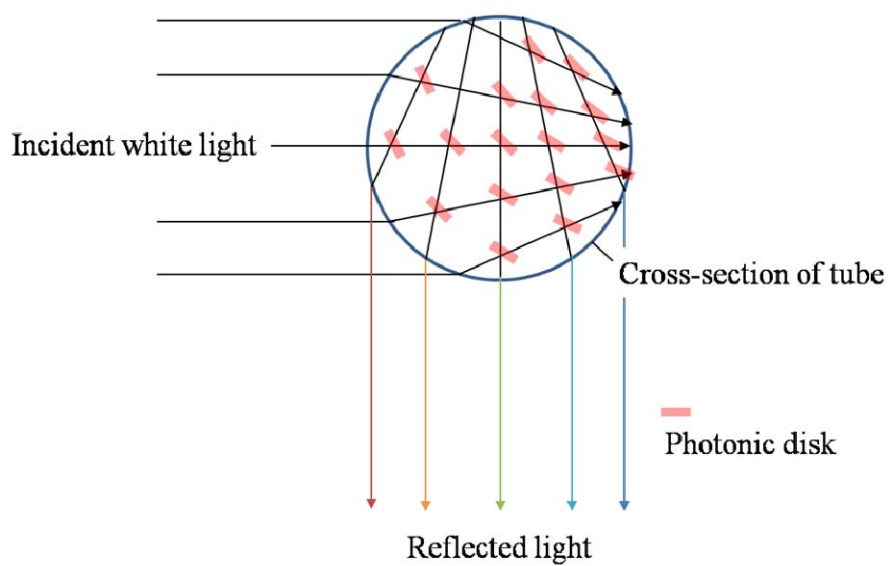

Figure S3. Schematic illustration for diffraction of photonic microparticles in the vial.
